# Supplementary material for: In Vitro Acute Exposure to DEHP Affects Oocyte Meiotic Maturation, Energy and Oxidative Stress Parameters in a Large Animal Model
Source: PLoS One. 2011 Nov 4;6(11):e27452. doi: 10.1371/journal.pone.0027452 (PMC3208636; doi:10.1371/journal.pone.0027452)
Supplement: File S1 — Apoptotic index of CCs isolated from matured (MII) and non matured (NM) oocytes after IVM in presence of DEHP (a) and DEHP+NAC (b), as assessed by TUNEL test. Intracellular ROS levels of CCs isolated from MII and NM oocytes after IVM in presence of DEHP (c) and DEHP+NAC (d), as assessed by DCF fluorescence intensity. (XLS) [file pone.0027452.s001.xls]

## Sheet: Suppl file 1
1a			TUNEL DEHP
							NM = unmatured
							MII = matured
						* p<0.05
						** p<0.0001
	0 DEHP NM	0 DEHP MII	0.12 DEHP NM	0.12 DEHP MII	12 DEHP NM	12 DEHP MII	1200 DEHP NM	1200 DEHP MII
Mean	28.39	21.05	45.9	24.4	55.23	44.62	41.89	38.62
Std. Deviation	8.42	14.97	21.69	7.697	27.22	21.7	13.28	9.786
Std. Error	1.883	4.734	5.111	2.434	6.088	6.863	2.969	3.095
# COCs evaluated	15	13	19	10	12	14	9	22
1b			TUNEL DEHP+NAC
						* p<0.05
						** p<0.0001
	0 + NAC NM	0 + NAC MII	0.12 + NAC NM	0.12 + NAC MII	12 + NAC NM	12 + NAC MII	1200 + NAC NM	1200 + NAC MII
Mean	20.37	19.14	24.62	25.04	46.14	29.24	47.07	49.35
Std. Deviation	13.98	11.48	8.067	10.06	13.55	9.567	18.78	17.95
Std. Error	4.42	3.631	2.551	3.181	4.286	3.025	5.938	5.677
# COCs evaluated	8	22	15	14	14	19	16	17
1c			DCF quantification DEHP
						* p<0.05
						** p<0.0001
	CTRL NM	CTRL MII	0,12 NM	0,12uM MII	12 NM	12uM MII	1200 NM	1200uM MII
Mean	448.9	394.6	351.9	298.4	349.8	692.9	376.5	555.3
Std. Deviation	141.8	145.4	121.7	62.45	67.48	120.4	149.3	84.3
Std. Error	19.48	21.21	16.27	8.579	8.711	17.37	19.96	10.88
# COCs evaluated	15	13	19	10	12	14	9	22
1d			DCF quantification DEHP + NAC
						* p<0.05
						** p<0.0001
	CTRL NM	CTRL MII	0,12 NM	0,12uM MII	12 NM	12uM MII	1200 NM	1200uM MII
Mean	352.6	515.4	400.8	333.2	327.9	670.1	252.7	430.8
Std. Deviation	62.43	107.9	59.26	90.04	70.83	132.8	42.31	75.36
Std. Error	9.107	13.93	7.715	11.62	9.729	17.15	6.045	9.729
# COCs evaluated	8	22	15	14	14	19	16	17
